# Supplementary material for: Computational and experimental studies of the wide bandgap semiconductors NH4TiOF3 and (NH4)2TiOF4
Source: Royal Society of Chemistry journal article supplement (doi:10.1039/d2cp05316k), 2023-01-01
Supplement: d2cp05316k1.pdf [file d2cp05316k1.pdf]

# Computational and Experimental Studies of the Wide Bandgap Semiconductors $\text{NH}_4\text{TiOF}_3$ and $(\text{NH}_4)_2\text{TiOF}_4$

Bingyu Lei,<sup>a</sup> Lisette Warren,<sup>a</sup> Carole Morrison,<sup>a</sup> Gwilherm Kerherve,<sup>b</sup> William S. J. Skinner,<sup>b</sup>  
David J. Payne,<sup>c</sup> and Neil Robertson\*<sup>a</sup>

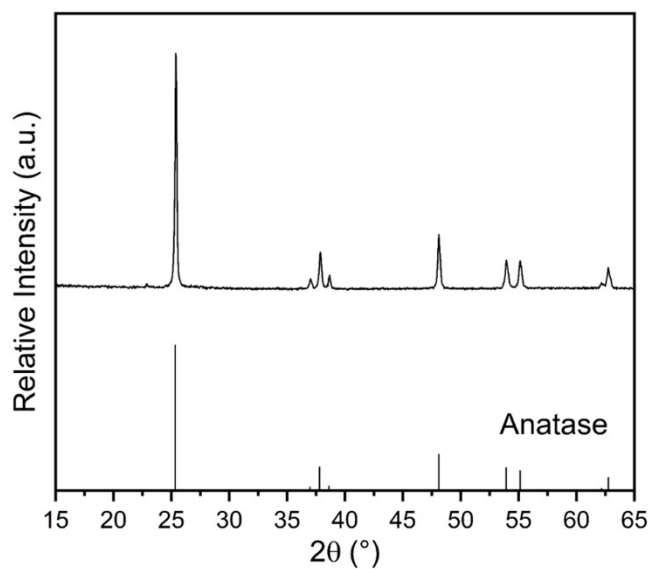

**Figure S1 XRD pattern of the sample prepared by sintering  $\text{NH}_4\text{TiOF}_3$  at 800 °C for 15 min, compared with standard PDF card (ICDD 86-1156) for anatase.**

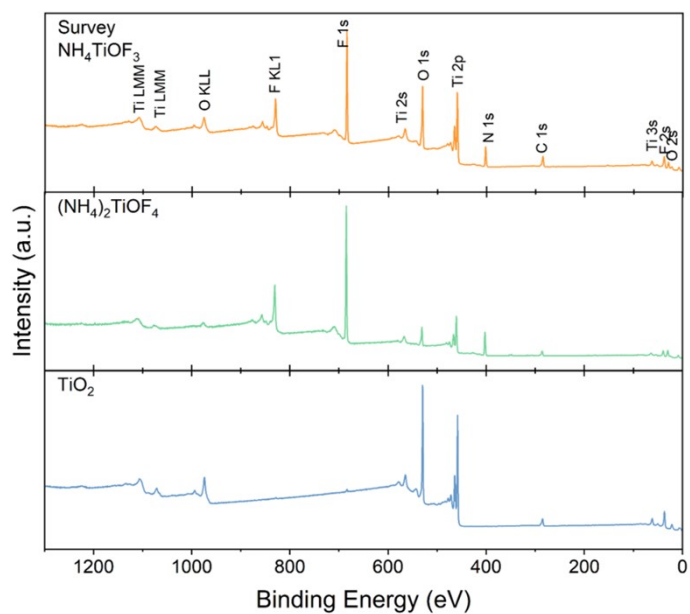

Figure S2 XPS survey spectra of (a)  $\text{NH}_4\text{TiOF}_3$ , (b)  $(\text{NH}_4)_2\text{TiOF}_4$  and (c)  $\text{TiO}_2$ .

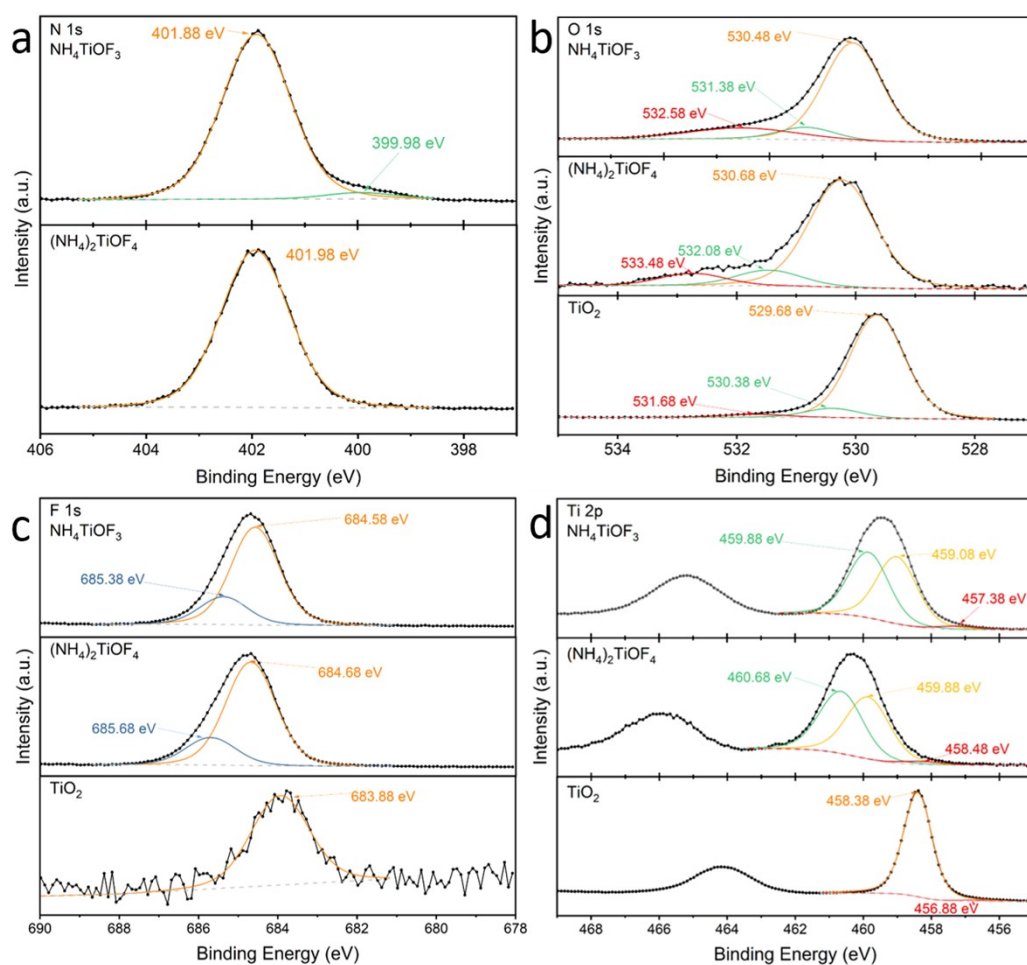

Figure S3 High-resolution XPS spectra of (a) N 1s (b) O 1s (c) F 1s and (d) Ti 2p.

**Table S1 Bond lengths of NH<sub>4</sub>TiOF<sub>3</sub> in the experimental data (labelled as single-point calculation) and after the geometry optimisation. Variation ( $\Delta$ ) was calculated referring to the experimental data.**

| <b>Bond</b>   | <b>Single-Point Calculation</b> | <b>Geometry Optimisation</b> | <b><math>\Delta</math>(%)</b> |
|---------------|---------------------------------|------------------------------|-------------------------------|
| <b>Ti1-O5</b> | 1.976                           | 2.196                        | 11.1                          |
|               | 1.901                           | 1.680                        | -11.6                         |
| <b>Ti1-F2</b> | 1.801                           | 1.831                        | 1.67                          |
| <b>Ti1-F3</b> | 1.928                           | 1.977                        | 2.54                          |
|               | 1.906                           | 1.964                        | 3.04                          |
| <b>Ti1-F4</b> | 1.863                           | 1.938                        | 4.03                          |

**Table S2 Bond angle of NH<sub>4</sub>TiOF<sub>3</sub> in the experimental data (labelled as single-point calculation) and after the geometry optimisation. Variation ( $\Delta$ ) was calculated referring to the experimental data.**

| <b>Bond</b>       | <b>Single-Point Calculation</b> | <b>Geometry Optimisation</b> | <b><math>\Delta</math>(%)</b> |
|-------------------|---------------------------------|------------------------------|-------------------------------|
| <b>F2-Ti1-F4</b>  | 170.2                           | 165.4                        | -2.82                         |
| <b>F3-Ti1-F3</b>  | 179.3                           | 166.8                        | -6.97                         |
| <b>Ti1-F3-Ti1</b> | 163.1                           | 153.8                        | -5.70                         |
| <b>O5-Ti1-O5</b>  | 171.7                           | 175.1                        | 1.98                          |
| <b>Ti1-O5-Ti1</b> | 153.8                           | 150.5                        | -2.15                         |

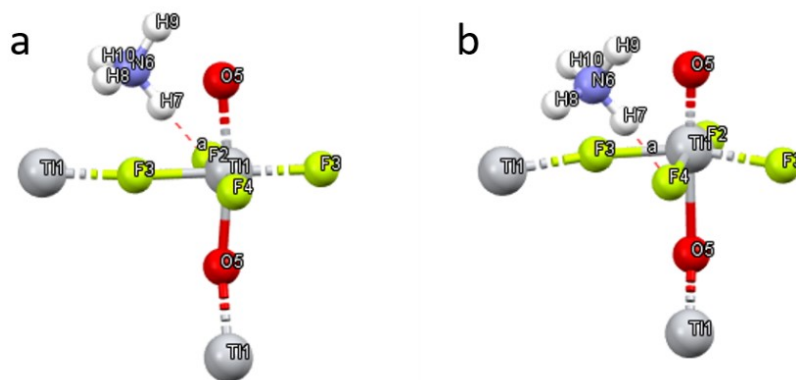

**Figure S4 Structure of  $\text{NH}_4\text{TiOF}_3$  (a) in the experimental data and (b) after the geometry optimisation.**

The Ti-O distances changed from 1.976 and 1.901 to 2.196 and 1.680 after the geometry optimisation, which means the Ti atoms are more off-centred in the  $\text{TiO}_2\text{F}_4$  octahedra in the ground state, or in other words, the O atoms are more unequally shared by two adjacent  $\text{TiO}_2\text{F}_4$  octahedra. This led to the changes of the Ti-F distances and the variance of the bond angles F-Ti-F and O-Ti-O.

**Table S3 Bond length of  $(\text{NH}_4)_2\text{TiOF}_4$  in the experimental data (labelled as single-point calculation) and after the geometry optimisation. Variation ( $\Delta$ ) was calculated referring to the experimental data.**

| Bond   | Single-Point Calculation | Geometry Optimisation | $\Delta(\%)$ |
|--------|--------------------------|-----------------------|--------------|
| Ti1-O2 | 1.95                     | 1.91                  | -1.91        |
| Ti1-F3 | 1.90                     | 1.90                  | 0.05         |
| Ti1-F4 | 1.90                     | 1.88                  | -0.61        |
| Ti5-O6 | 1.95                     | 1.89                  | -3.29        |
| Ti5-F7 | 1.90                     | 1.91                  | 0.55         |
| Ti5-F8 | 1.89                     | 1.91                  | 0.87         |

**Table S4 Bond angle of  $(\text{NH}_4)_2\text{TiOF}_4$  in the experimental data (labelled as single-point calculation) and after the geometry optimisation. Variation ( $\Delta$ ) was calculated referring to the experimental data.**

| Bond       | Single-Point Calculation | Geometry Optimisation | $\Delta(\%)$ |
|------------|--------------------------|-----------------------|--------------|
| O2-Ti1-O2  | 180                      | 180                   | 0            |
| F3-Ti1-F3  | 180                      | 180                   | 0            |
| F4-Ti1-F4  | 180                      | 180                   | 0            |
| Ti1-O2-Ti1 | 149.99                   | 143.77                | -4.15        |
| O6-Ti5-O6  | 180                      | 180                   | 0            |
| F7-Ti5-F7  | 180                      | 180                   | 0            |
| F8-Ti5-F8  | 180                      | 180                   | 0            |
| Ti5-O6-Ti5 | 150.58                   | 149.75                | -0.55        |

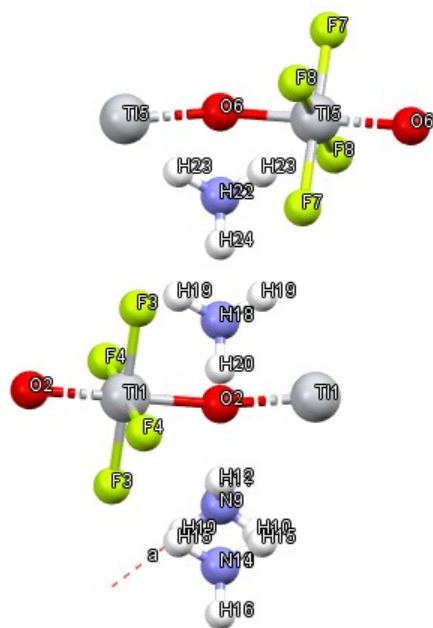

Figure S5 Structure of (NH<sub>4</sub>)<sub>2</sub>TiOF<sub>4</sub> with label of atoms.

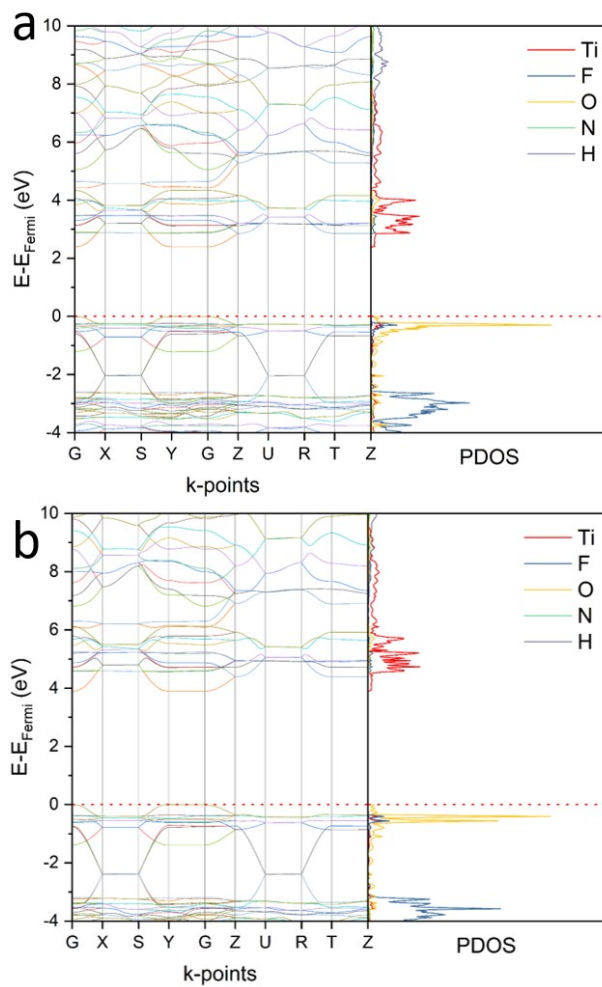

**Figure S6** Computed band structures and corresponding PDOS of  $\text{NH}_4\text{TiOF}_3$  using different functionals after the single-point energy calculation. (a) PBE-D3,  $E_{\text{Fermi}} = -5.35$  eV, computed band gap: 2.39 eV; (b) B3LYP-D3,  $E_{\text{Fermi}} = -6.21$  eV, computed band gap: 3.89 eV.

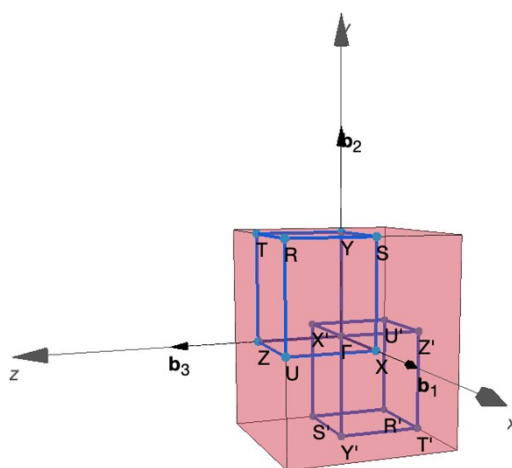

**Figure S7** K-point path in the first Brillouin zone of  $\text{NH}_4\text{TiOF}_3$ .

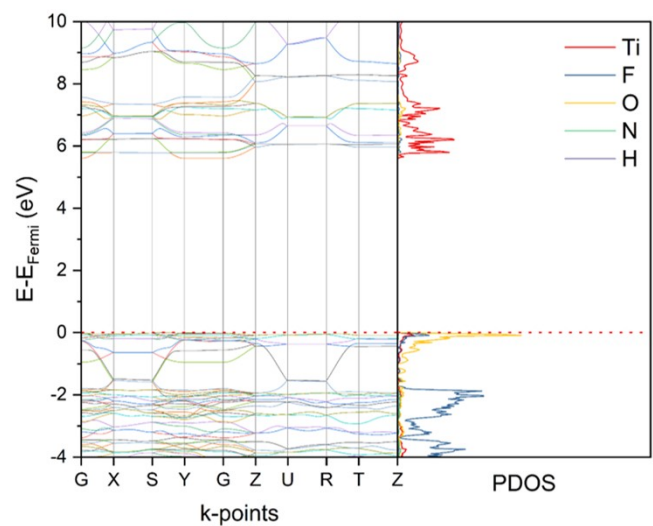

Figure S8 Computed density of states of  $\text{NH}_4\text{TiOF}_3$  using HSE06-D3 after the geometry optimisation.  $E_{\text{Fermi}} = -7.75$  eV.

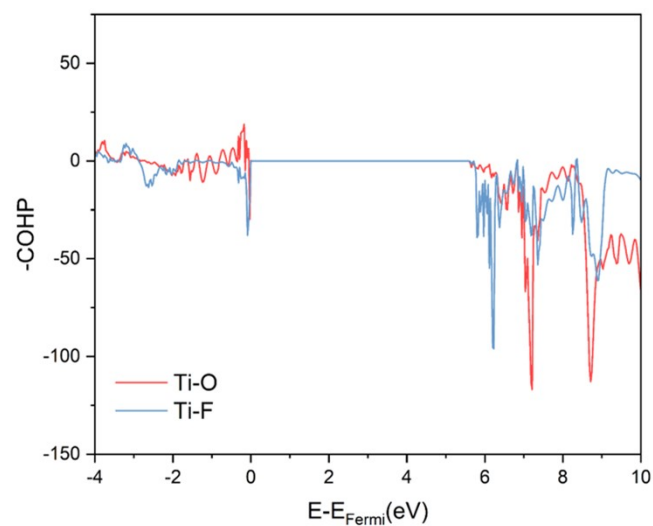

Figure S9 COHP of  $\text{NH}_4\text{TiOF}_3$  over Ti-O (red line) and Ti-F (blue line) bonds, computed after geometry optimisation using HSE06-D3 functional.



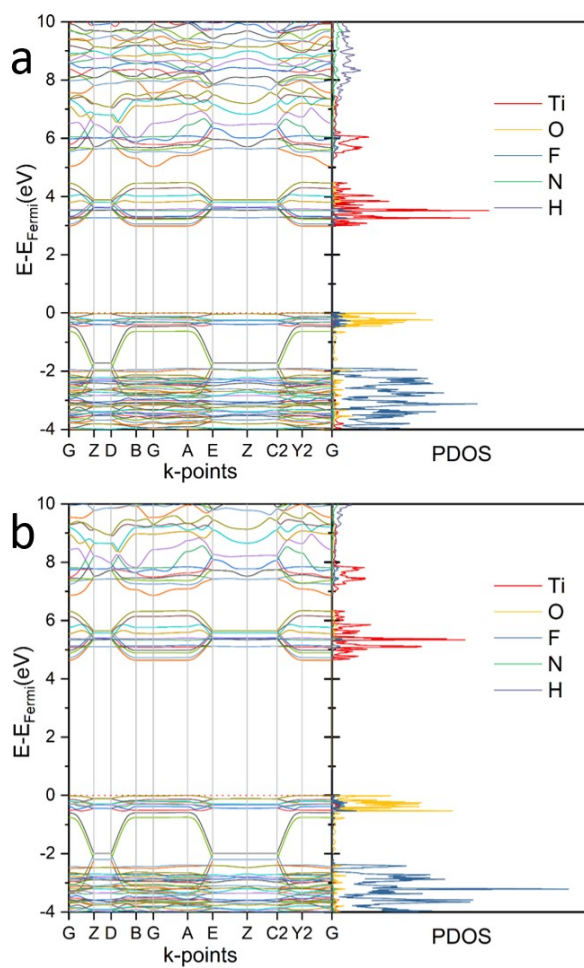

**Figure S10** Computed band structures and corresponding PDOS of  $(\text{NH}_4)_2\text{TiOF}_4$  using different functionals after the single-point energy calculation. (a) PBE-D3,  $E_{\text{Fermi}} = -5.52$  eV, computed band gap: 2.98 eV; (b) B3LYP-D3,  $E_{\text{Fermi}} = -6.50$  eV, computed band gap: 4.64 eV.

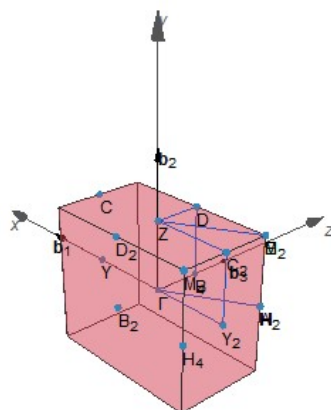

**Figure S11** K-point path in the first Brillouin zone of  $(\text{NH}_4)_2\text{TiOF}_4$ .

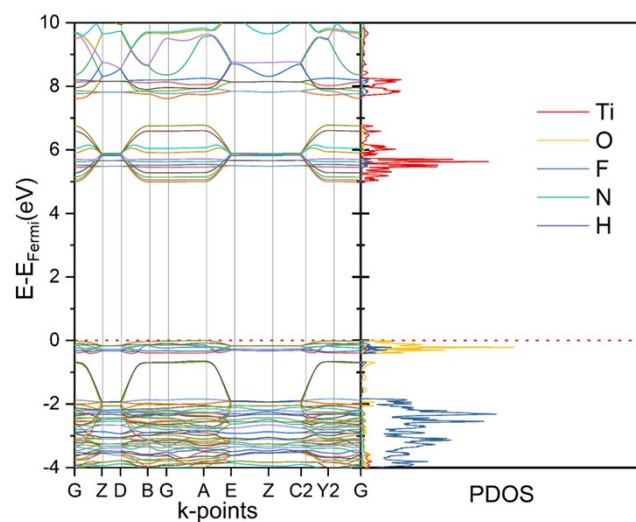

Figure S12 Computed band structure and density of states of  $(\text{NH}_4)_2\text{TiOF}_4$  using HSE06-D3 after the geometry optimisation.

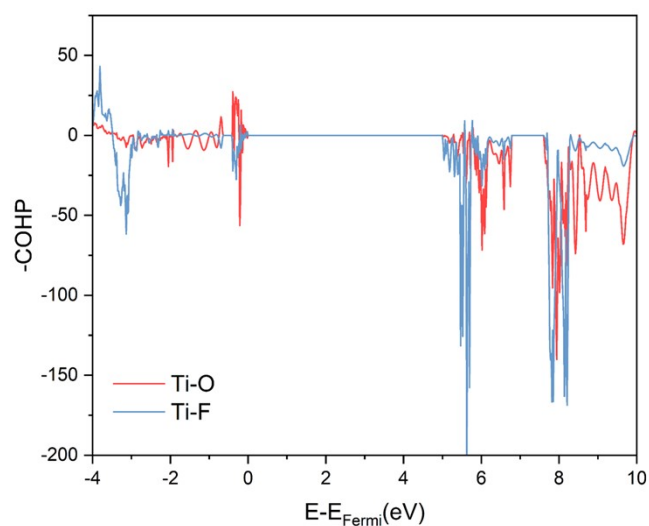

Figure S13 COHP of  $(\text{NH}_4)_2\text{TiOF}_4$  over Ti-O (red line) and Ti-F (blue line) bonds, computed after geometry optimisation using HSE06-D3 functional.

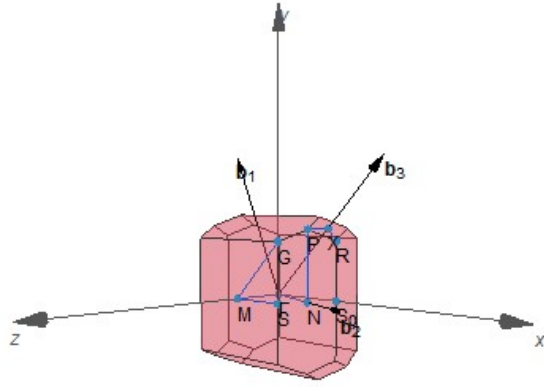

**Figure S14** K-point path in the first Brillouin zone of anatase TiO<sub>2</sub>.

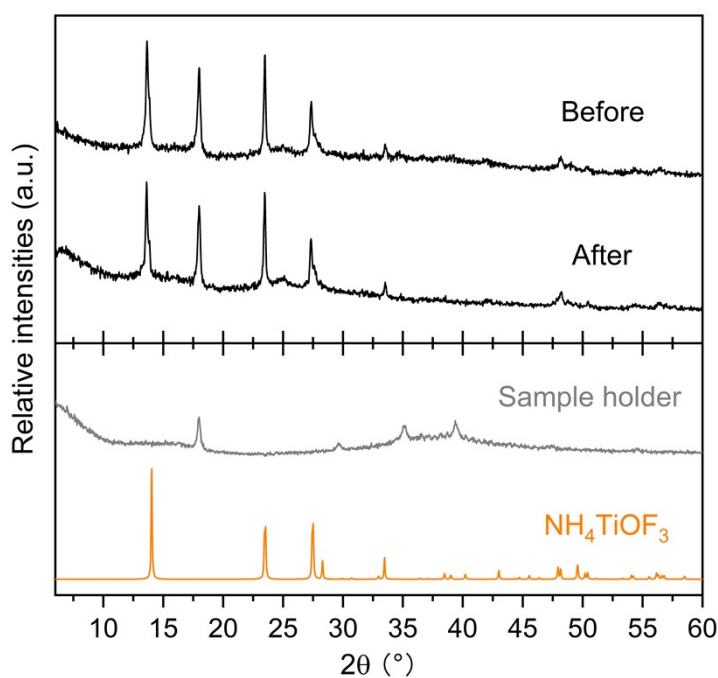

Figure S15 XRD patterns of the immobilised  $\text{NH}_4\text{TiOF}_3$  sample before and after the photocatalysis test. A sample holder was used for the XRD measurements and the corresponding peaks are provided.  $\text{NH}_4\text{TiOF}_3$ : CCDC 1880514.

Table S5 Degradation rate constants of the immobilised  $\text{NH}_4\text{TiOF}_3$ , compared with immobilised P25 and no catalyst.

| Sample                     | 1 <sup>st</sup> order rate constant ( $10^{-3} \text{ min}^{-1}$ ) |                 |
|----------------------------|--------------------------------------------------------------------|-----------------|
|                            | RhB                                                                | MB              |
| $\text{NH}_4\text{TiOF}_3$ | $9.26 \pm 0.02$                                                    | $9.28 \pm 0.98$ |
| P25                        | $16.9 \pm 0.08$                                                    | $21.1 \pm 0.17$ |
| No catalyst                | $-0.48 \pm 0.01$                                                   | $0.23 \pm 0.04$ |

Table S6 Adsorption efficiency of MB using different photocatalysts.

| Sample                     | Adsorption efficiency of MB (%) |
|----------------------------|---------------------------------|
| $\text{NH}_4\text{TiOF}_3$ | 24.3                            |
| P25                        | 2.94                            |
| No catalyst                | 0.76                            |

The adsorption efficiency was calculated by  $(C_{\text{MB}} - C_0)/C_{\text{MB}}$ , where  $C_{\text{MB}}$  is the initial concentration of the tested methylene blue solution and  $C_0$  is the concentration at the light on point, i.e. after the dark adsorption.
